# Supplementary material for: A surface sulfurization strategy for tuning the lithiophilicity of garnet electrolyte pellets towards advanced solid-state lithium metal electrolyte
Source: Royal Society of Chemistry journal article supplement (doi:10.1039/d4se00784k), 2024-01-01
Supplement: d4se00784k1.pdf [file d4se00784k1.pdf]

## Supporting Information

### **A surface sulfurization strategy for tuning the lithiophilicity of garnet electrolyte pellets towards advanced solid-state Lithium metal electrolyte**

Genxi Yu<sup>1</sup>, Youchun Wu<sup>2</sup>, Dawei Sha<sup>2</sup>, Jianwen Cai<sup>1</sup>, Gaofa Nie<sup>1</sup>, Yaping Wang<sup>2</sup>, Long Pan<sup>2,\*</sup>, ZhengMing Sun<sup>2,\*</sup>

*<sup>1</sup>School of Automotive Engineering, Changzhou Institute of Technology, Changzhou 213032, China*

*<sup>2</sup>School of Materials Science and Engineering, Southeast University, Nanjing 211189, China*

*\*E-mail: [zmsun@seu.edu.cn](mailto:zmsun@seu.edu.cn); [panlong@seu.edu.cn](mailto:panlong@seu.edu.cn)*

## Methods

**Computational methods and models.** All calculations were carried out by using the projector augmented wave method in the framework of the density functional theory<sup>[1]</sup>, as implemented in the Vienna ab-initio Simulation Package (VASP). The generalized gradient approximation (GGA) and Perdew–Burke–Ernzerhof (PBE) exchange functional<sup>[1]</sup> was used. Structural relaxation calculations were performed by using the spin-polarized GGA method<sup>[2]</sup>. For the interface calculations with large supercells, we just need to use the  $1 \times 1 \times 1$  k-mesh. The convergence criterions of energy and force calculations were set to  $10^{-5}$  eV/atom and  $0.01$  eV  $\text{\AA}^{-1}$ , respectively. The  $\text{Li}_2\text{CO}_3$  (001)/Li (001) and  $\text{Li}_2\text{S}$  (001)/Li (001) interface models were constructed by  $\text{Li}_2\text{CO}_3$ (001) slab,  $\text{Li}_2\text{S}$  (001) slab and Li (001) slab, which are the low-energy surfaces<sup>[3-5]</sup>. The coherent interface approximation was applied, in which the soft Li (001)  $4 \times 4$  surface slabs are less strained to match the  $\text{Li}_2\text{S}$  (001)  $2 \times 2$  surface slabs. The Li (001)  $3 \times 2$  surface slab is less strained to match the  $\text{Li}_2\text{CO}_3$  (001)  $1 \times 1$  surface slab.

To evaluate the wettability of Li metal on the  $\text{Li}_2\text{CO}_3$  and  $\text{Li}_2\text{S}$  surfaces, we calculated the interface formation energies of  $\text{Li}_2\text{CO}_3$  (001)/Li(001) and  $\text{Li}_2\text{S}$  (001)/Li (001) systems, which can be evaluated by the energy difference between an interface system and the bulk energy of the two materials that comprise it,  $E_f = (E_{ab} - N_a * E_a - N_b * E_b) / 2S$ <sup>[6]</sup>, here,  $E_{ab}$  denotes the total energy of the complete system containing the interface, and it depends on how many formula units of materials a and b comprise the interface ( $N_a$  and  $N_b$ , respectively).  $E_a$  and  $E_b$  denote the bulk energy per formula unit for materials a and b, respectively, and S refers to the interfacial area, 2 means two interfaces in the interface models.

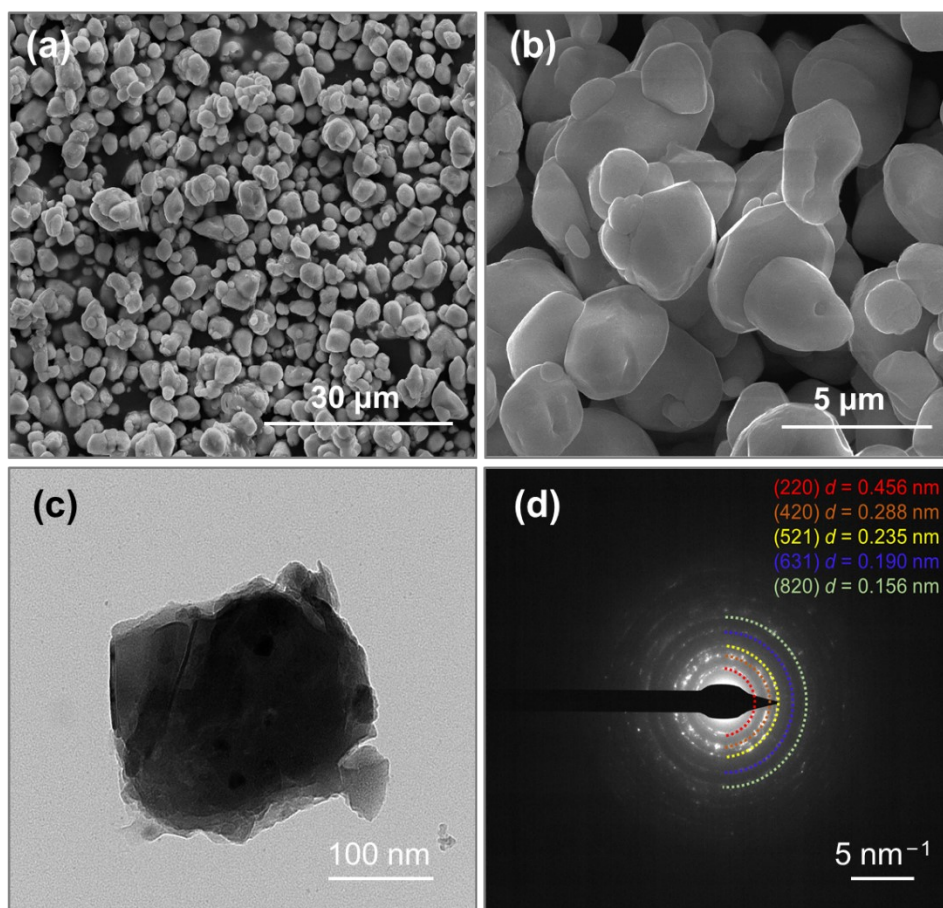

**Figure S1** (a), (b) SEM images of LLZT particles at different magnifications, (c), (d) TEM image of LLZT@LS particle and corresponding SAED pattern.

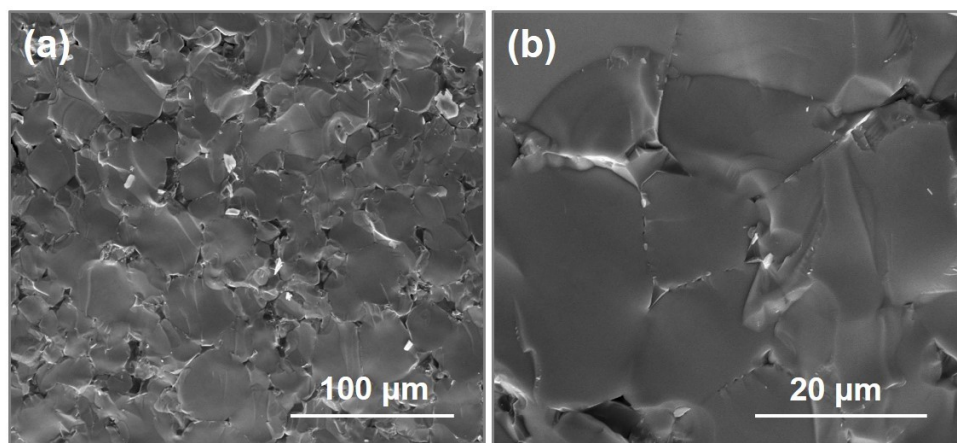

**Figure S2** (a), (b) Cross-section SEM images of LLZT pellet at different magnifications.

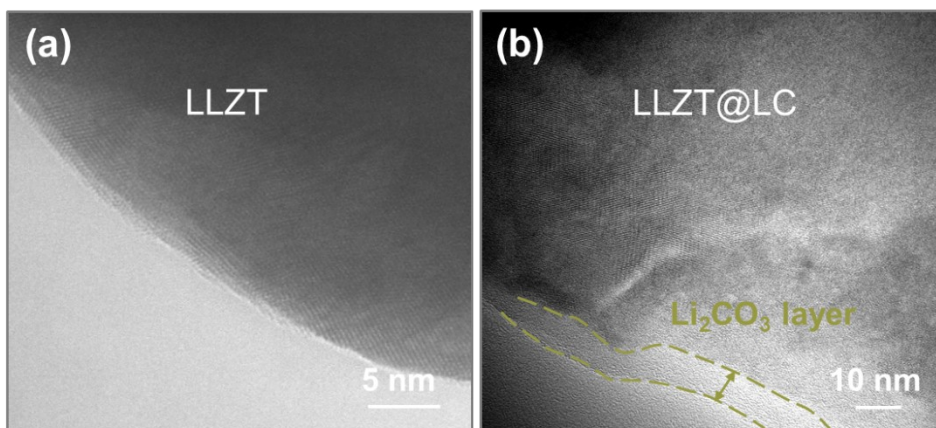

**Figure S3** (a), (b) TEM image of LLZT and LLZT@LC particles, respectively.

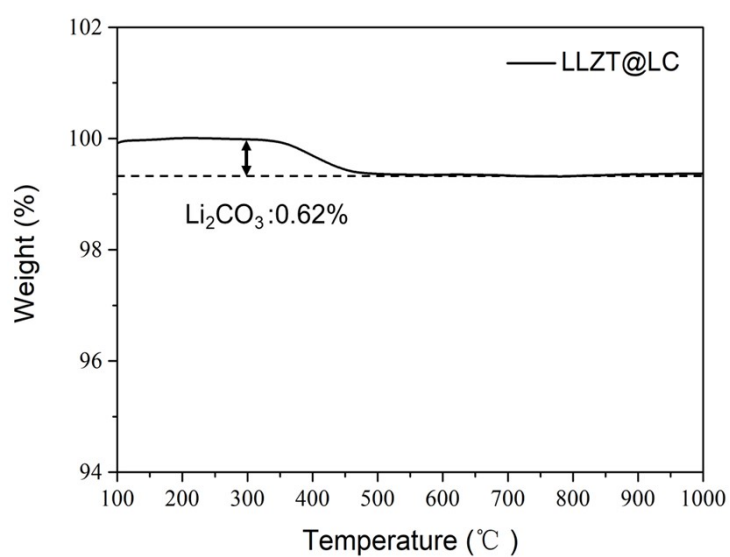

**Figure S4** TGA curve of LLZT@LC particles.

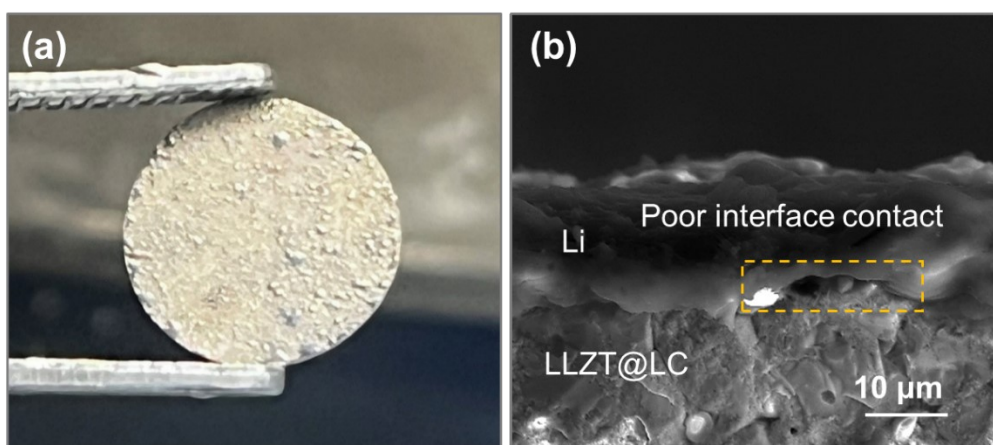

**Figure S5** (a) Optical image of molten lithium on LLZT@LC by repeated rubbed, (b) Surface SEM images of LLZT@LC after rub-coating molten Li.

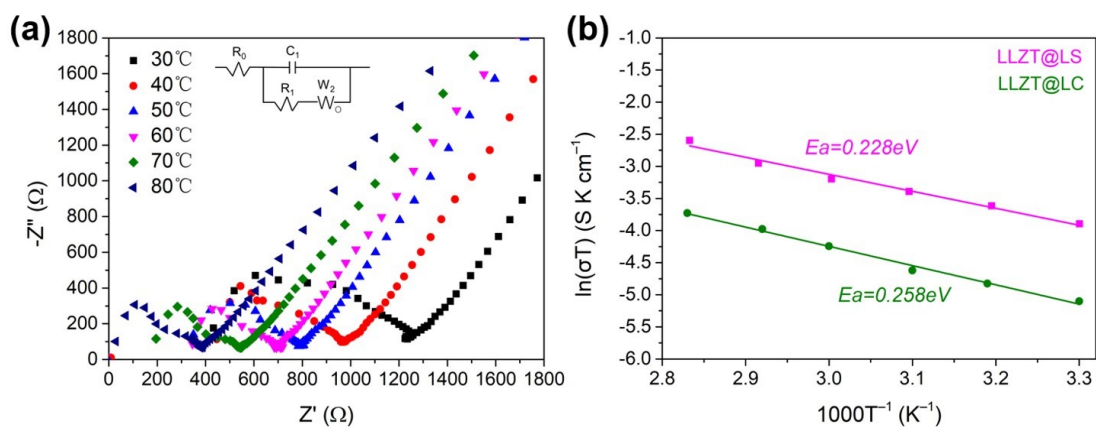

**Figure S6** (a) Nyquist plots of the LLZT@LS pellets at temperatures arranged from 30 °C to 80 °C, the inset shows the equivalent circuit, (b) Arrhenius plots of the ionic conducting for the LLZT@LS and LLZT@LC.

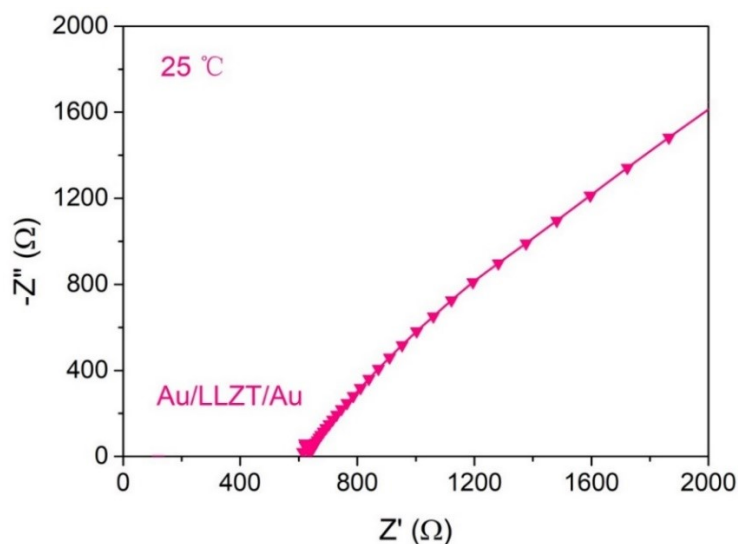

**Figure S7** EIS spectrum of the LLZT pellet at 25 °C.

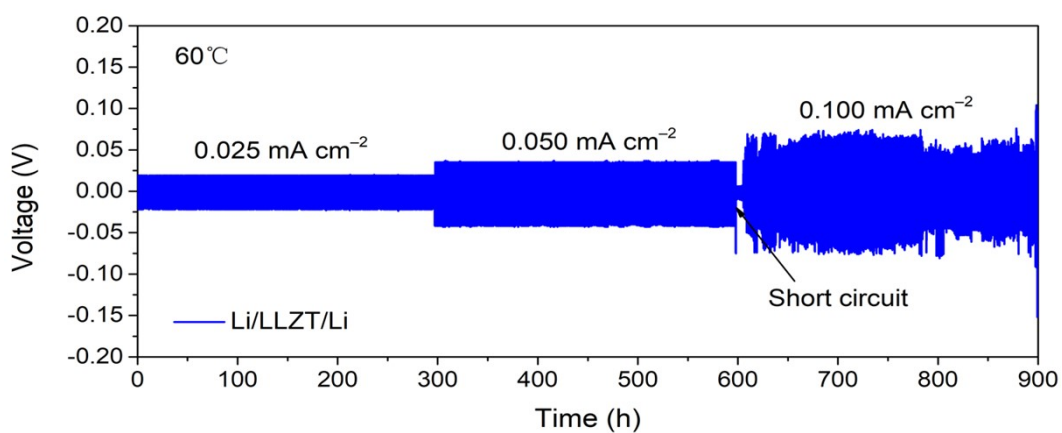

**Figure S8** Charge-discharge voltage profiles of Li/LLZT/Li cell at a current density of 0.025, 0.05, and 0.1 mA cm<sup>-2</sup>.

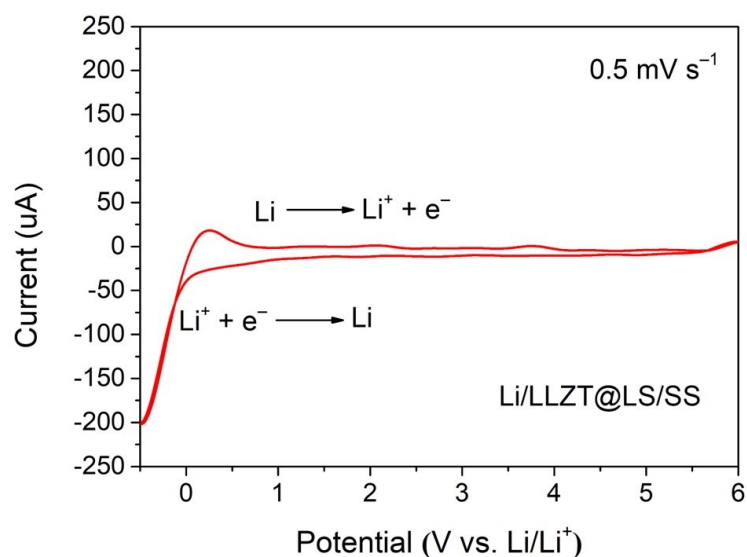

**Figure S9** Cyclic voltammogram of the Li/LLZT@LS/SS cell at  $0.5 \text{ mV s}^{-1}$  and  $60 \text{ }^\circ\text{C}$ .

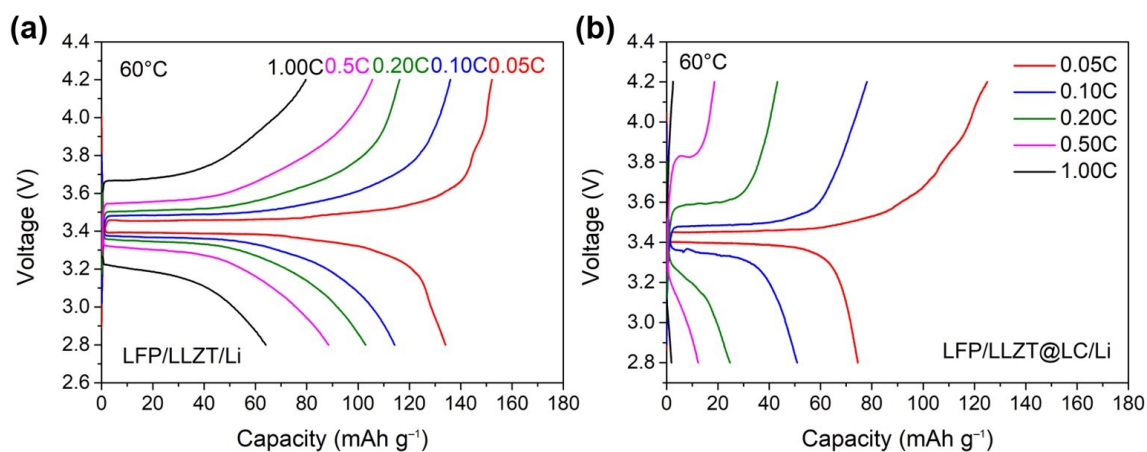

**Figure S10** Charge-discharge voltage profiles of (a) LFP/LLZT/Li and (b) LFP/LLZT@LC/Li cell at different rates.

**Table S1** Relative density data for cubic LLZT pellets.

| LLZT    | $m_{\text{LLZT}}$ | $P_{\text{ethanol}}$      | $m_{\text{submerged}}$ | $P_{\text{real}}$         | $P_{\text{theoretical}}$ | $P_{\text{relative}}$ |
|---------|-------------------|---------------------------|------------------------|---------------------------|--------------------------|-----------------------|
| Group 1 | 0.598 g           | $0.789 \text{ g cm}^{-3}$ | 0.512 g                | $5.486 \text{ g cm}^{-3}$ | $5.5 \text{ g cm}^{-3}$  | 99.7%                 |
| Group 2 | 0.578 g           | $0.789 \text{ g cm}^{-3}$ | 0.495 g                | $5.494 \text{ g cm}^{-3}$ | $5.5 \text{ g cm}^{-3}$  | 99.8%                 |

**Table S2** The interface formation energies (in  $\text{J m}^{-2}$ ) of  $\text{Li}_2\text{CO}_3$  (001)/Li (001) and  $\text{Li}_2\text{S}$  (001)/Li (001) systems.

| Interface                              | Li <sub>2</sub> CO <sub>3</sub> (001)/Li (001) | Li <sub>2</sub> S (001)/Li (001) |
|----------------------------------------|------------------------------------------------|----------------------------------|
| E <sub>f</sub> (in J m <sup>-2</sup> ) | -0.78                                          | -4.54                            |

### Supplementary References:

- [1] W. Kohn and L. J. Sham, *Phys. Rev.*, 1965, **140**, A1133.
- [2] S. L. Dudarev, G. A. Botton, S. Y. Savrasov, C. J. Humphreys and A. P. Sutton, *Phys. Rev. B*, 1998, **57**, 1505.
- [3] J. F. Wu, B. W. Pu, D. Wang, S. Q. Shi, N. Zhao, X. Guo and X. Guo, *ACS Appl. Mater. Interfaces*, 2019, **11**, 898–905.
- [4] M. Bruno and M. Prencipe, *Surf. Sci.*, 2007, **601**, 3012–3019.
- [5] L. Pastero, F. R. Massaro and D. Aquilano, *Cryst. Growth Des.*, 2007, **7**, 2749-2755.
- [6] N. D. Lepley and N. A. W. Holzwarth, *Phys. Rev. B*, 2015, **92**, 214201.
